# Supplementary material for: Flexible Film Bulk Acoustic Resonator Based on Low-Porosity β-Phase P(VDF-TrFE) Film for Human Vital Signs Monitoring
Source: MDPI journal article supplement (doi:10.3390/s23042136), 2023-02-14
Supplement: s1 [file s1]

# Supplementary Materials

## Flexible Film Bulk Acoustic Resonator based on Low-porosity $\beta$ -phase P(VDF-TrFE) Film for Human Vital Signs Monitoring

Zhentao Yu<sup>1</sup>, Feng Gao<sup>1,2,\*</sup>, Xiangyu He<sup>1</sup>, Hao Jin<sup>1,2</sup>, Shurong Dong<sup>1,2</sup>, Zhen Cao<sup>1</sup>, Jikui Luo<sup>1,2</sup>

1. Key Lab. of Advanced Micro/Nano Electronic Devices and Smart Systems of Zhejiang, College of Information Science and Electronic Engineering, Zhejiang University, Hangzhou 310027, China;
2. ZJU-Hangzhou Global Scientific and Technological Innovation Center, Hangzhou 311215, China;

\* Correspondence: [gao.feng@zju.edu.cn](mailto:gao.feng@zju.edu.cn) (F.G.);

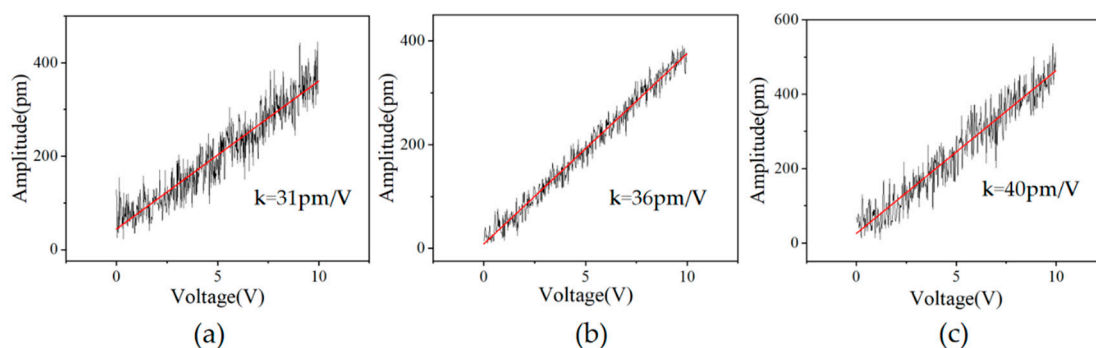

**Figure S1.** The amplitude vs voltage curves of three other PFM testing points on the PVDF-TrFE film.

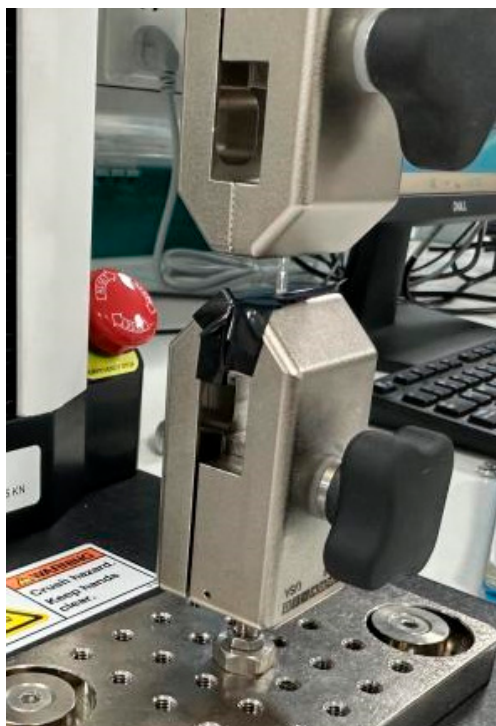

**Figure S2.** Device stretchability test setup.

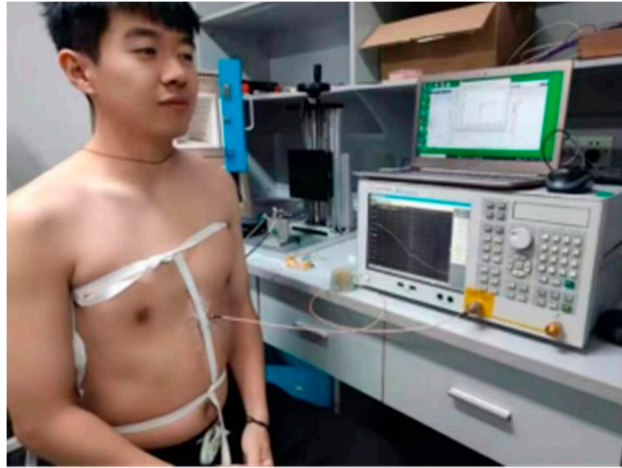

**Figure S3.** Image of the test system setup.
